# Supplementary material
Source: publisher figshare collection journal article supplement (https://rs.figshare.com/ndownloader/files/20415825)
Supplement: Supplementary file 1 [file 20415825]

## Sheet: Sheet1
ZNF	Primate specific	Traced back to: (Thomas & Schneider 2011)	# Promoter binding sites that overlap w/ KAP1
ZNF202	N	Marsupial	35
ZNF257	Y	Simian	6
ZNF263	N	Marsupial	18
ZNF282	N	Marsupial	18
ZNF441	Y	Simian	4
ZNF468	Y	Catarrhine	12
ZNF479	N		11
ZNF519	Y	Hominoid	30
ZNF534	Y	Catarrhine	32
ZNF783	N	Marsupial	5
